# Supplementary material
Source: Springer Nature journal article supplement (https://www.springermedizin.de/resource/supplementary/12955_2009_656_MOESM8_ESM.pdf/9561016)
Supplement: MOESM8 [file 9561016]

### Scores on NEI-VFQ Subscales: Factor "Visual acuity"

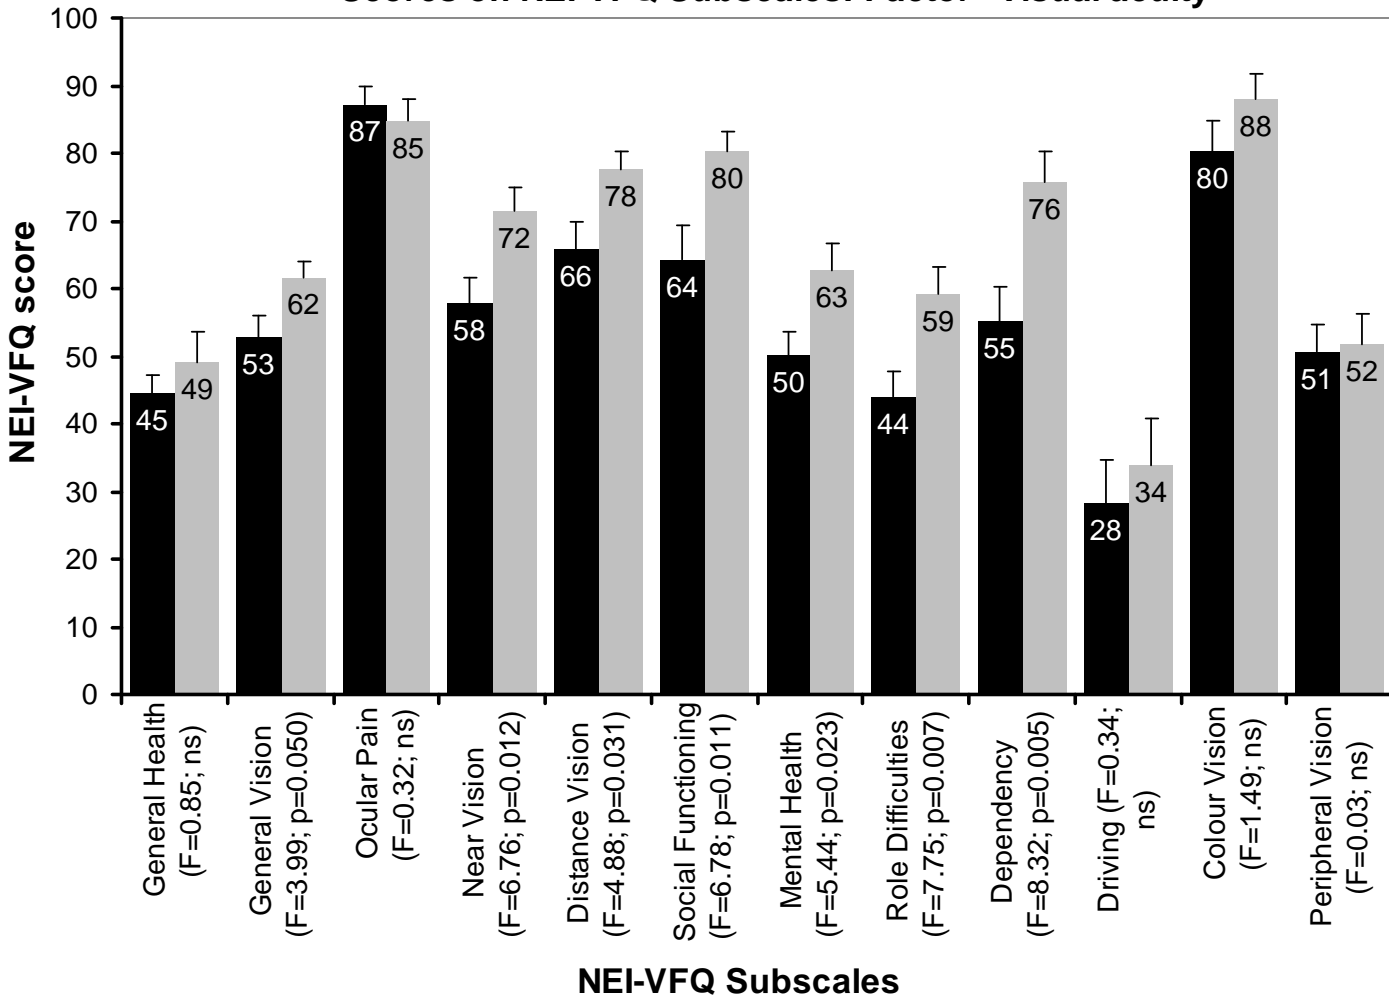

### Scores on SF-36 Subscales: Factor "Visual acuity"

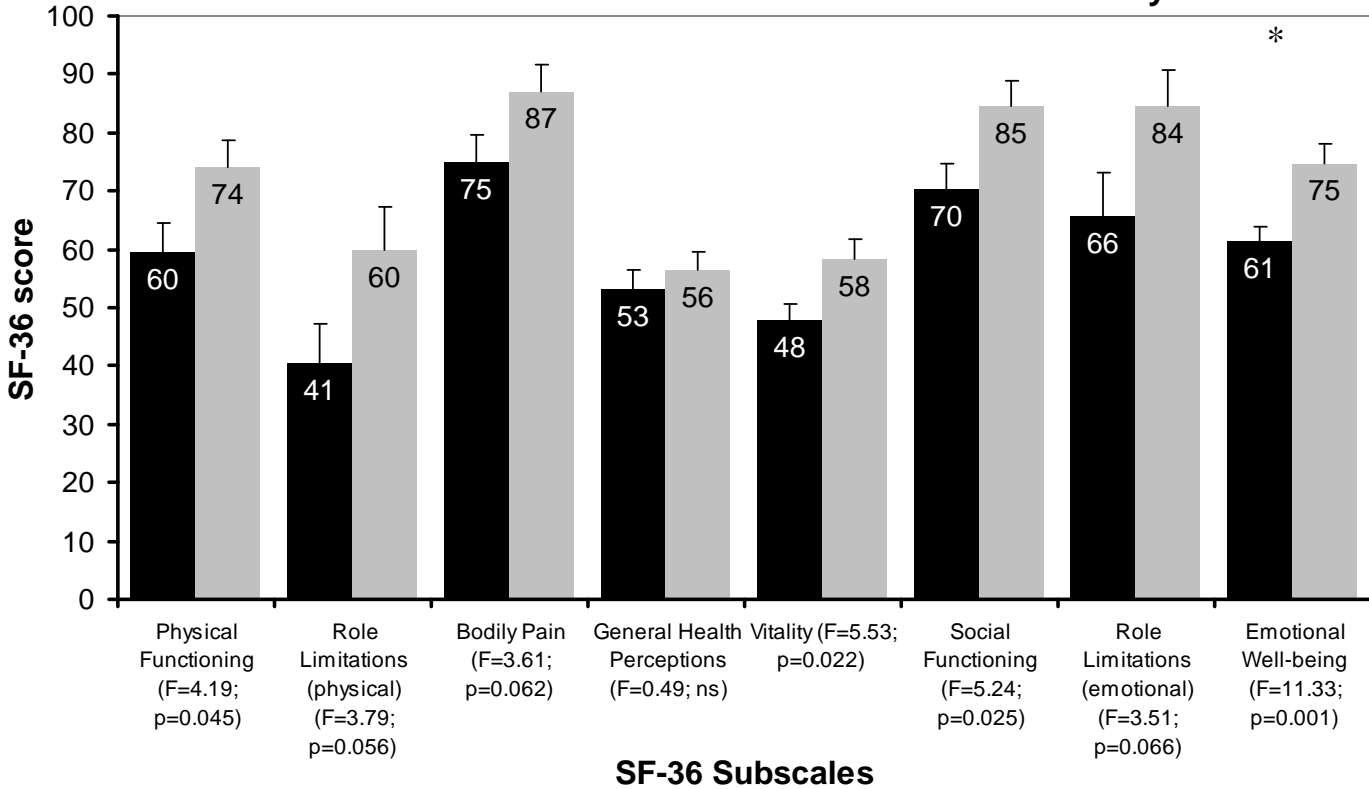

■ Visual acuity 0-50%    ■ Visual acuity > 50%
